# Supplementary material for: Catalytic Degradation of Ciprofloxacin in Aqueous Solution by Peroxymonosulfate Activated with a Magnetic CuFe2O4@Biochar Composite
Source: MDPI journal article supplement (doi:10.3390/ijms24065702), 2023-03-16
Supplement: s1 [file s1]

## **Supporting Information**

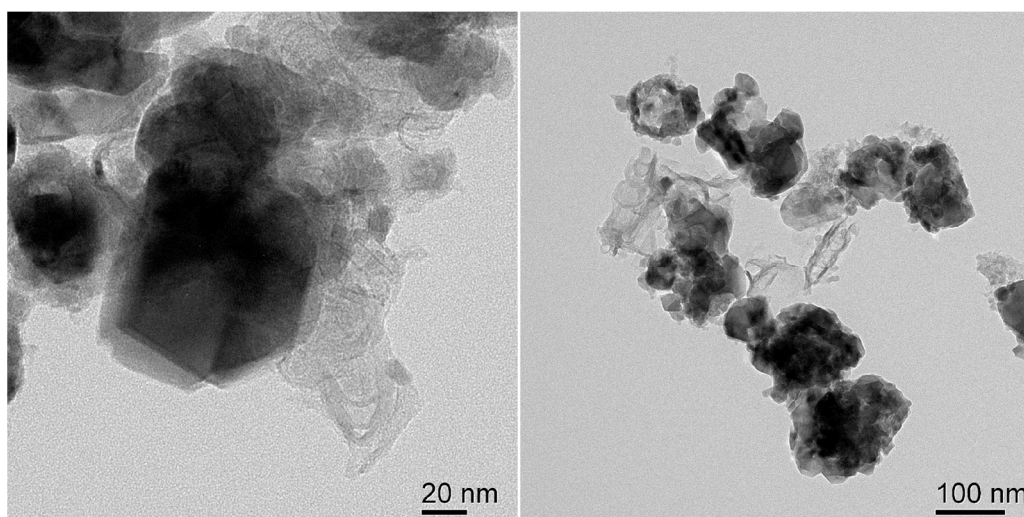

**Figure S1.** Representative TEM image of the  $\text{CuFe}_2\text{O}_4@\text{BC}$  particles.

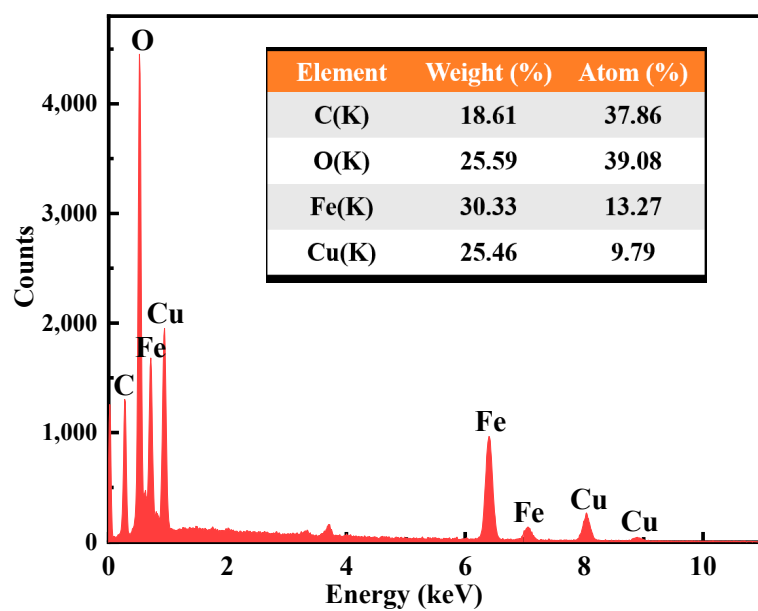

**Figure S2.** EDS spectrum of the  $\text{CuFe}_2\text{O}_4@\text{BC}$ .

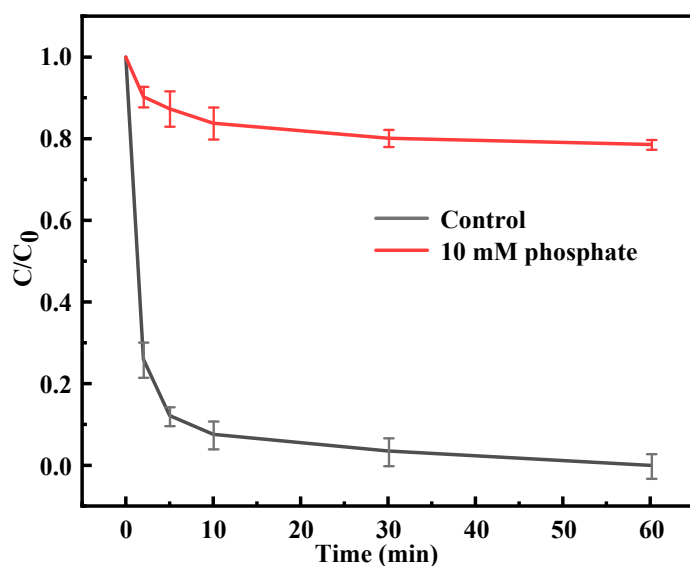

**Figure S3.** CIP degradation with adding 10 mM phosphate ions in CuFe<sub>2</sub>O<sub>4</sub>@BC/PMS system. Reaction conditions: [CIP] = 10 mg/L, [PMS] = 2.5 mM, [catalysts] = 0.1 g/L, initial pH = 7.0, temperature = 25 °C.

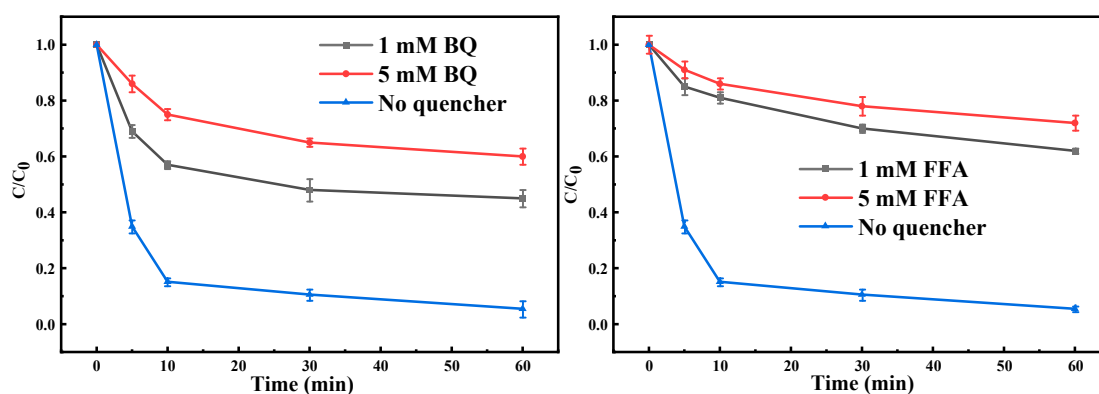

**Figure S4.** CIP degradation with adding different concentrations of BQ and FFA in CuFe<sub>2</sub>O<sub>4</sub>@BC/PMS system. Reaction conditions: [CIP] = 10 mg/L, [PMS] = 2.5 mM, [catalysts] = 0.1 g/L, initial pH = 7.0, temperature = 25 °C.

**Table S1.** Concentrations of leached metal ions from different reaction conditions.

| Conditions                                     | Copper Ions (mg/L) | Iron Ions (mg/L) |
|------------------------------------------------|--------------------|------------------|
| CuFe <sub>2</sub> O <sub>4</sub> @BC<br>(pH=3) | 0.363              | 0.105            |
| CuFe <sub>2</sub> O <sub>4</sub> @BC<br>(pH=7) | 0.214              | 0.087            |
| CuFe <sub>2</sub> O <sub>4</sub><br>(pH=3)     | 1.290              | 0.525            |
| CuFe <sub>2</sub> O <sub>4</sub><br>(pH=7)     | 1.279              | 0.455            |

**Table S2.** Comparison of the reaction parameters with previously reported catalysts for PMS activation.

| Pollution                                  | Catalysts Loading                                                              | PMS Dosage            | Removal Efficiency | Reference |
|--------------------------------------------|--------------------------------------------------------------------------------|-----------------------|--------------------|-----------|
| PCB28 (0.5 mg L <sup>-1</sup> )            | CuFe <sub>2</sub> O <sub>4</sub> (0.1 g L <sup>-1</sup> )                      | 0.2 mM                | 89% (8 h)          | [51]      |
| Phenol (35 mg L <sup>-1</sup> )            | Cu-MnO <sub>2</sub> (0.3 g L <sup>-1</sup> )                                   | 0.4 g L <sup>-1</sup> | 100% (40 min)      | [53]      |
| methylene blue<br>(20 mg L <sup>-1</sup> ) | CuFe <sub>2</sub> O <sub>4</sub> -AC<br>(0.2 g L <sup>-1</sup> )               | 2.0 g L <sup>-1</sup> | 100% (2 h)         | [54]      |
| CIP (10 mg L <sup>-1</sup> )               | ZCFO (0.1 g L <sup>-1</sup> )                                                  | 2.5 mM                | 96.6% (15 min)     | [39]      |
| BPS (10 μM)                                | CuCo <sub>2</sub> S <sub>4</sub> (0.01 g L <sup>-1</sup> )                     | 100 μM                | 100% (30 min)      | [55]      |
| BPA (10 mg L <sup>-1</sup> )               | Mn <sub>1.8</sub> Fe <sub>1.2</sub> O <sub>4</sub><br>(0.1 g L <sup>-1</sup> ) | 0.2 g L <sup>-1</sup> | 95% (30 min)       | [43]      |
| 4-CP<br>(100 μM)                           | Co-Black TNT                                                                   | 1 mM                  | 100% (30 min)      | [38]      |
| CIP (10 mg L <sup>-1</sup> )               | CuFe <sub>2</sub> O <sub>4</sub> @BC<br>(0.1 g L <sup>-1</sup> )               | 2.5 mM                | 97.8% (30 min)     | Our work  |

**Table S3.** Comparison of activation energy of CIP degradation with previously reported catalysts.

| Entry | System                                   | Catalysts loading      | Oxidant dosage        | Ea          | Reference |
|-------|------------------------------------------|------------------------|-----------------------|-------------|-----------|
| 1     | nano-Co <sub>3</sub> O <sub>4</sub> /PMS | 0.1 g L <sup>-1</sup>  | 1 mM                  | 61.9 kJ/mol | [46]      |
| 2     | Co@N-C/PMS                               | 0.1 g L <sup>-1</sup>  | 0.25 mM               | 35.4 kJ/mol | [56]      |
| 3     | MnFe <sub>2</sub> O <sub>4</sub> /PMS    | 0.05 g L <sup>-1</sup> | 0.5 g L <sup>-1</sup> | 31.7 kJ/mol | [57]      |
| 4     | CuFe <sub>2</sub> O <sub>4</sub> @BC/PMS | 0.1 g L <sup>-1</sup>  | 2.5 mM                | 16.2 kJ/mol | Our work  |

**Table S4.** Summary on the second-order reaction rates of EtOH, TBA, FFA, BQ and the first-order reaction rates of BQ with different ROS.

| Scavengers | Second-order reaction rate constants(M <sup>-1</sup> s <sup>-1</sup> )[20,58] |                               |                              |                             |
|------------|-------------------------------------------------------------------------------|-------------------------------|------------------------------|-----------------------------|
|            | •OH                                                                           | SO <sub>4</sub> <sup>•-</sup> | O <sub>2</sub> <sup>•-</sup> | <sup>1</sup> O <sub>2</sub> |
| EtOH       | 1.9 × 10 <sup>9</sup>                                                         | (1.6-7.7) × 10 <sup>7</sup>   | < 10 <sup>3</sup>            | 3.8 × 10 <sup>3</sup>       |
| TBA        | (3.8-7.6) 10 <sup>8</sup>                                                     | (4.0-8.1) × 10 <sup>5</sup>   | < 10 <sup>3</sup>            | < 10 <sup>4</sup>           |
| FFA        | 1.5 × 10 <sup>10</sup>                                                        | No reaction                   | No reaction                  | 1.2 × 10 <sup>8</sup>       |
| BQ         | 1.2 10 <sup>9</sup>                                                           | 1.0 × 10 <sup>8</sup>         | (0.9-1.9) × 10 <sup>9</sup>  | 6.6 × 10 <sup>7</sup>       |
| Scavengers | First-order reaction rate constants(M <sup>-1</sup> s <sup>-1</sup> )[59]     |                               |                              |                             |
|            | •OH                                                                           | SO <sub>4</sub> <sup>•-</sup> | O <sub>2</sub> <sup>•-</sup> | <sup>1</sup> O <sub>2</sub> |
| BQ         | 4.8 × 10 <sup>6</sup>                                                         | 4.0 × 10 <sup>5</sup>         | (3.6-4.0) × 10 <sup>6</sup>  | 1.52 × 10 <sup>5</sup>      |

## References:

51. Qin, W.; Fang, G.; Wang, Y.; Zhou, D. Mechanistic understanding of polychlorinated biphenyls degradation by peroxymonosulfate activated with CuFe<sub>2</sub>O<sub>4</sub> nanoparticles: Key role of superoxide radicals. *Chemical Engineering Journal* **2018**, *348*, 526-534, doi:10.1016/j.cej.2018.04.215.
53. Huang, Y.; Tian, X.; Nie, Y.; Yang, C.; Wang, Y. Enhanced peroxymonosulfate activation for phenol degradation over MnO<sub>2</sub> at pH 3.5-9.0 via Cu(II) substitution. *Journal of hazardous materials* **2018**, *360*, 303-310, doi:10.1016/j.jhazmat.2018.08.028.
54. Oh, W.D.; Lua, S.K.; Dong, Z.; Lim, T.T. Performance of magnetic activated carbon composite as peroxymonosulfate activator and regenerable adsorbent via sulfate radical-mediated oxidation processes. *Journal of hazardous materials* **2015**, *284*, 1-9, doi:10.1016/j.jhazmat.2014.10.042.
39. Yu, R.; Zhao, J.; Zhao, Z.; Cui, F. Copper substituted zinc ferrite with abundant oxygen vacancies for enhanced ciprofloxacin degradation via peroxymonosulfate activation. *Journal of hazardous materials* **2020**, *390*, 121998, doi:10.1016/j.jhazmat.2019.121998.
55. Xu, H.; Wang, D.; Ma, J.; Zhang, T.; Lu, X.; Chen, Z. A superior active and stable spinel sulfide for catalytic peroxymonosulfate oxidation of bisphenol S. *Applied Catalysis B: Environmental* **2018**, *238*, 557-567, doi:10.1016/j.apcatb.2018.07.058.
43. Huang, G.-X.; Wang, C.-Y.; Yang, C.-W.; Guo, P.-C.; Yu, H.-Q. Degradation of Bisphenol A by Peroxymonosulfate Catalytically Activated with Mn<sub>1.8</sub>Fe<sub>1.2</sub>O<sub>4</sub> Nanospheres: Synergism between Mn and Fe. *Environmental science & technology* **2017**, *51*, 12611-12618, doi:10.1021/acs.est.7b03007.
38. Lim, J.; Yang, Y.; Hoffmann, M.R. Activation of Peroxymonosulfate by Oxygen Vacancies-Enriched Cobalt-Doped Black TiO<sub>2</sub> Nanotubes for the Removal of Organic Pollutants. *Environmental science & technology* **2019**, *53*, 6972-6980, doi:10.1021/acs.est.9b01449.
46. Deng, J.; Feng, S.; Zhang, K.; Li, J.; Wang, H.; Zhang, T.; Ma, X. Heterogeneous activation of peroxymonosulfate using ordered mesoporous Co<sub>3</sub>O<sub>4</sub> for the degradation of chloramphenicol at neutral pH. *Chemical Engineering Journal* **2017**, *308*, 505-515, doi:10.1016/j.cej.2016.09.075.
56. Li, H.; Tian, J.; Zhu, Z.; Cui, F.; Zhu, Y.-A.; Duan, X.; Wang, S. Magnetic nitrogen-doped nanocarbons for enhanced metal-free catalytic oxidation: Integrated experimental and theoretical investigations for mechanism and application. *Chemical Engineering Journal* **2018**, *354*, 507-516, doi:10.1016/j.cej.2018.08.043.
57. Zhu, L.; Shi, Z.; Deng, L.; Duan, Y. Efficient degradation of sulfadiazine using magnetically recoverable MnFe<sub>2</sub>O<sub>4</sub>/δ-MnO<sub>2</sub> hybrid as a heterogeneous catalyst of peroxymonosulfate. *Colloids and Surfaces A: Physicochemical and Engineering Aspects* **2021**, *609*, 125637, doi:10.1016/j.colsurfa.2020.125637.
20. Zhang, T.; Zhu, H.; Croué, J.-P. Production of Sulfate Radical from Peroxymonosulfate Induced by a Magnetically Separable CuFe<sub>2</sub>O<sub>4</sub> Spinel in Water: Efficiency, Stability, and Mechanism. *Environmental science & technology* **2013**, *47*, 2784-2791, doi:10.1021/es304721g.
58. Duan, X.; Sun, H.; Wang, Y.; Kang, J.; Wang, S. N-Doping-Induced Nonradical Reaction on Single-Walled Carbon Nanotubes for Catalytic Phenol Oxidation. *ACS Catalysis* **2014**, *5*, 553-559, doi:10.1021/cs5017613.
59. Wang, Y.; Cao, D.; Zhao, X. Heterogeneous degradation of refractory pollutants by peroxymonosulfate activated by CoOx-doped ordered mesoporous carbon. *Chemical Engineering Journal* **2017**, *328*, 1112-1121, doi:10.1016/j.cej.2017.07.042.
